# Supplementary material for: Limestone nanoparticles as nanopore templates in polymer membranes: narrow pore size distribution and use as self-wetting dialysis membranes
Source: Royal Society of Chemistry journal article supplement (doi:10.1039/c4ra12613k), 2014-11-10

## Supporting information

Fig. S1 Buffer exchange rate (1 M KMnO<sub>4</sub> vs. 1 M PBS) for different types of membranes after ten seconds (left) and 60 seconds (right). (a) PES, (b) ethanol pretreated PES and (c) TEC modified PES membranes show slow wettability, whereas (d) CA, (e) Millipore V50 and (f) Spectrum membranes are readily wettable.

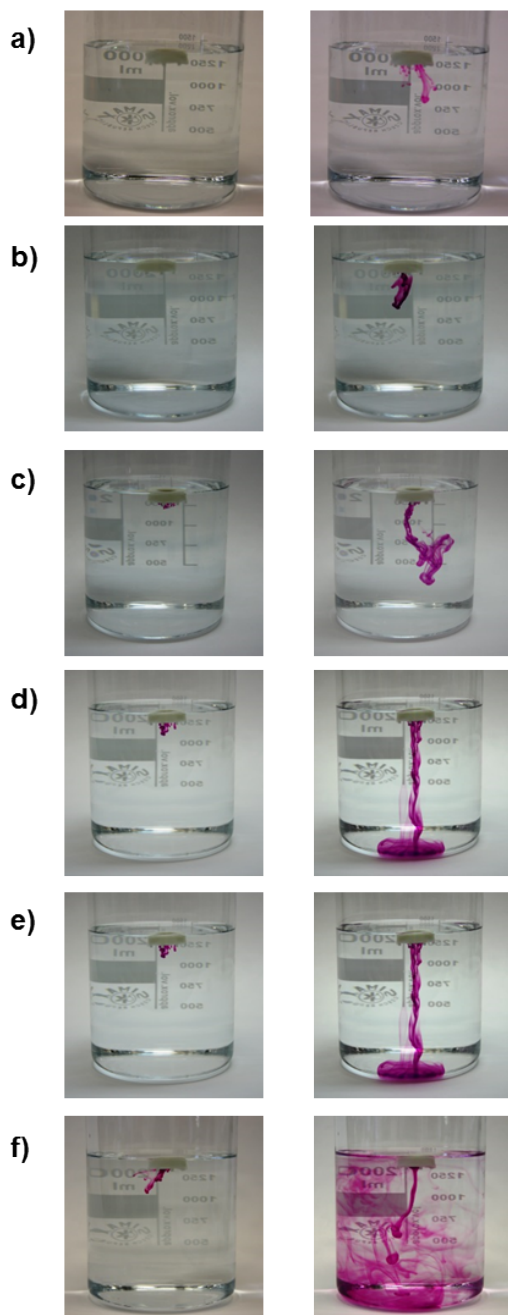

Supplement: c4ra12613k1.pdf [file c4ra12613k1.pdf]
